# Supplementary material for: Phyllosphere bacterial assembly in citrus crop under conventional and ecological management
Source: PeerJ journal article supplement (doi:10.7717/peerj.9152), 2020-06-02

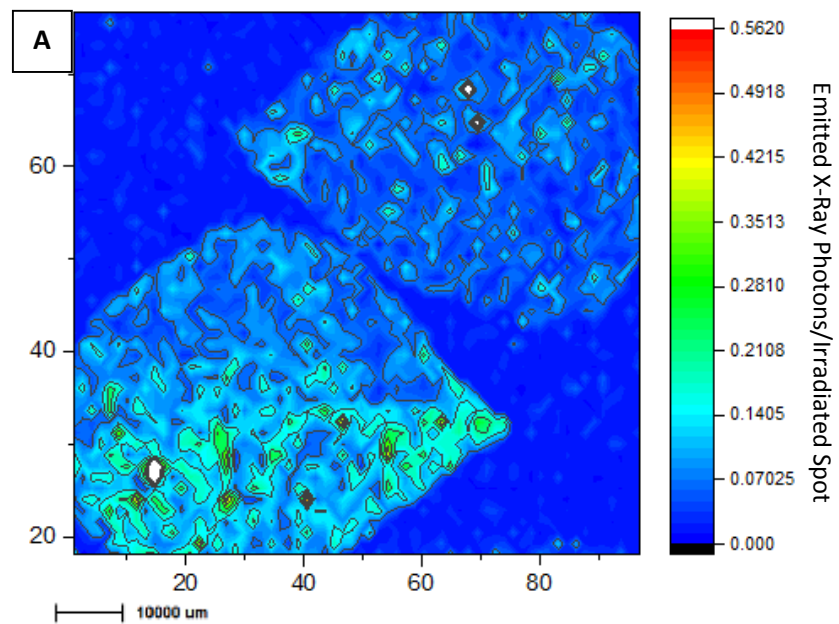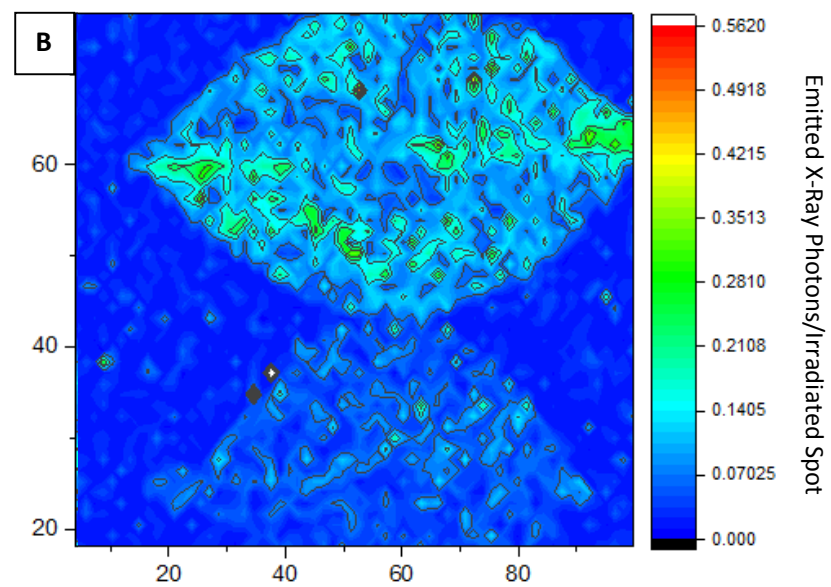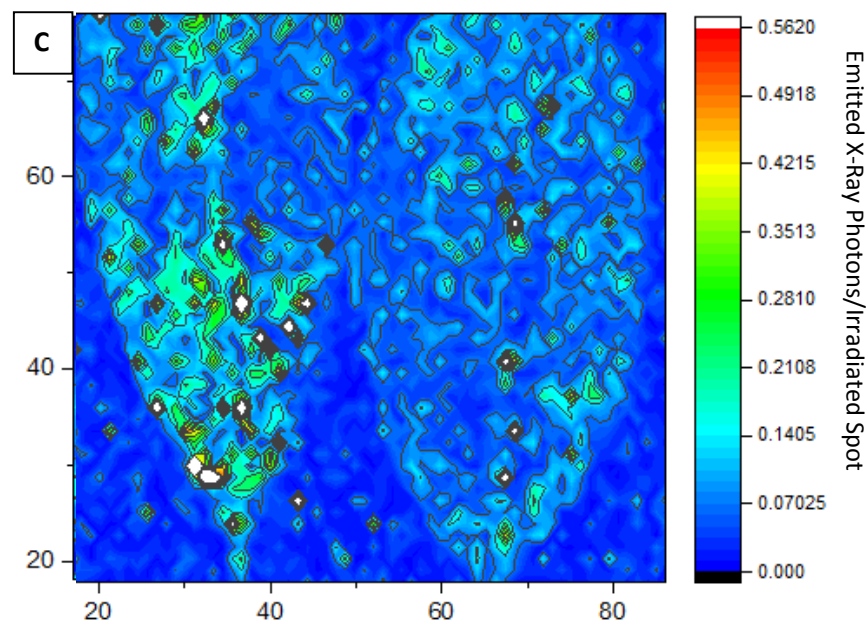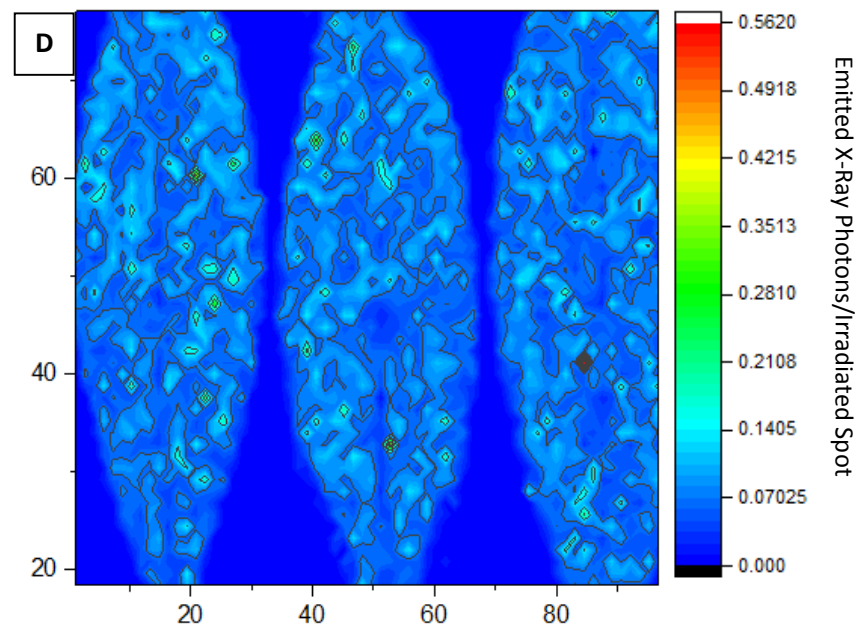

Supplement: Suplemental_Figure_1.pdf [file Suplemental_Figure_1.pdf]
